# Supplementary material for: Classification study of solvation free energies of organic molecules using machine learning techniques
Source: Royal Society of Chemistry journal article supplement (doi:10.1039/c4ra07961b), 2014-01-01
Supplement: c4ra07961b1.pdf [file c4ra07961b1.pdf]

## **Classification Study of Solvation Free Energy of Organic Molecules with Machine Learning Techniques**

N.S. Hari Narayana Moorthy\*, Silvia A. Martins, Sergio F Sousa, Maria J. Ramos, Pedro A.  
Fernandes

REQUIMTE, Departamento de Química e Bioquímica, Faculdade de Ciências, Universidade  
do Porto, s/n, Rua do Campo Alegre, 4169-007 Porto, Portugal.

**Table S1: List of molecules considered for the classification analysis along with their solvation free energies**

| <b>Molecular Code</b> | <b>Molecule name</b> | <b>Type of molecules</b> | <b>Solvation free energy (kcal/mol)</b> |
|-----------------------|----------------------|--------------------------|-----------------------------------------|
| DB0001                | Methane              | Alkane                   | 1.97                                    |
| DB0002                | Ethane               | Alkane                   | 1.83                                    |
| DB0003                | Propane              | Alkane                   | 1.97                                    |
| DB0004                | Butane               | Alkane                   | 2.10                                    |
| DB0005                | Pentane              | Alkane                   | 2.33                                    |
| DB0006                | Hexane               | Alkane                   | 2.50                                    |
| DB0007                | Heptane              | Alkane                   | 2.64                                    |
| DB0008                | Octane               | Alkane                   | 2.89                                    |
| DB0009                | 2-methylpropane      | Alkane                   | 2.31                                    |
| DB0010                | 2-methylbutane       | Alkane                   | 2.38                                    |
| DB0011                | 2-methylpentane      | Alkane                   | 2.52                                    |
| DB0012                | 3-methylpentane      | Alkane                   | 2.51                                    |
| DB0013                | 2-methylhexane       | Alkane                   | 2.93                                    |
| DB0014                | 3-methylhexane       | Alkane                   | 2.71                                    |
| DB0015                | 3-methylheptane      | Alkane                   | 2.97                                    |
| DB0016                | cyclopentane         | Alkane                   | 1.20                                    |
| DB0017                | cyclohexane          | Alkane                   | 1.23                                    |
| DB0018                | cycloheptane         | Alkane                   | 0.80                                    |
| DB0019                | cyclooctane          | Alkane                   | 0.86                                    |
| DB0020                | Benzene              | Arenes                   | -0.87                                   |
| DB0021                | Toluene              | Arenes                   | -0.83                                   |
| DB0022                | o-xylene             | Arenes                   | -0.90                                   |
| DB0023                | m-xylene             | Arenes                   | -0.82                                   |
| DB0024                | p-xylene             | Arenes                   | -0.81                                   |
| DB0025                | naphtalene           | Arenes                   | -2.41                                   |
| DB0026                | anthracene           | Arenes                   | -4.17                                   |
| DB0027                | phenanthrene         | Arenes                   | -3.99                                   |
| DB0028                | Pyridine             | Heterocyclics            | -4.69                                   |
| DB0029                | Pyrrole              | Heterocyclics            | -4.78                                   |
| DB0030                | Thiophene            | Heterocyclics            | -1.42                                   |
| DB0031                | Imidazole            | Heterocyclics            | -9.63                                   |
| DB0032                | Methanol             | Alcohols and Phenols     | -5.10                                   |
| DB0033                | Ethanol              | Alcohols and Phenols     | -4.96                                   |
| DB0034                | 1-Propanol           | Alcohols and Phenols     | -4.85                                   |
| DB0035                | 1-Butanol            | Alcohols and Phenols     | -4.73                                   |
| DB0036                | 1-Pentanol           | Alcohols and Phenols     | -4.52                                   |
| DB0037                | 1-Hexanol            | Alcohols and Phenols     | -4.38                                   |
| DB0038                | 1-Heptanol           | Alcohols and Phenols     | -4.25                                   |
| DB0039                | 1-Octanol            | Alcohols and Phenols     | -4.11                                   |
| DB0040                | 2-Propanol           | Alcohols and Phenols     | -4.76                                   |
| DB0041                | 2-Butanol            | Alcohols and Phenols     | -4.61                                   |
| DB0042                | 2-Pentanol           | Alcohols and Phenols     | -4.40                                   |
| DB0043                | 3-Pentanol           | Alcohols and Phenols     | -4.35                                   |
| DB0044                | 3-Hexanol            | Alcohols and Phenols     | -3.91                                   |
| DB0045                | 4-Heptanol           | Alcohols and Phenols     | -4.01                                   |

|        |                        |                      |        |
|--------|------------------------|----------------------|--------|
| DB0046 | 2-methylpropane-2-ol   | Alcohols and Phenols | -4.49  |
| DB0047 | 2-methylbutane-2-ol    | Alcohols and Phenols | -4.43  |
| DB0048 | 2-methylpentane-2-ol   | Alcohols and Phenols | -3.93  |
| DB0049 | Cyclopentanol          | Alcohols and Phenols | -5.49  |
| DB0050 | Cyclohexanol           | Alcohols and Phenols | -5.28  |
| DB0051 | Cycloheptanol          | Alcohols and Phenols | -5.49  |
| DB0052 | Phenol                 | Alcohols and Phenols | -6.59  |
| DB0053 | 2-methylphenol         | Alcohols and Phenols | -5.87  |
| DB0054 | 3-methylphenol         | Alcohols and Phenols | -5.49  |
| DB0055 | 4-methylphenol         | Alcohols and Phenols | -6.13  |
| DB0056 | 2,3-dimethylphenol     | Alcohols and Phenols | -6.16  |
| DB0057 | 3,4-dimethylphenol     | Alcohols and Phenols | -6.50  |
| DB0058 | 2,6-dimethylphenol     | Alcohols and Phenols | -5.26  |
| DB0059 | 2,4-dimethylphenol     | Alcohols and Phenols | -6.01  |
| DB0060 | 3,5-dimethylphenol     | Alcohols and Phenols | -6.27  |
| DB0061 | 2,5-dimethylphenol     | Alcohols and Phenols | -5.91  |
| DB0062 | 1-hydroxynapthalene    | Alcohols and Phenols | -7.67  |
| DB0063 | 2-hydroxynapthalene    | Alcohols and Phenols | -8.11  |
| DB0064 | Nonane                 | Alkane               | 3.13   |
| DB0065 | 2,2-dimethylpropane    | Alkane               | 2.53   |
| DB0066 | 2,2-dimethylbutane     | Alkane               | 2.57   |
| DB0067 | 2,2-dimethylpentane    | Alkane               | 2.88   |
| DB0068 | 3,3-dimethylpentane    | Alkane               | 2.56   |
| DB0069 | Methylcyclopentane     | Alkane               | 1.60   |
| DB0070 | Methylcyclohexane      | Alkane               | 1.71   |
| DB0071 | 1,2,3-trimethylbenzene | Arenes               | -1.21  |
| DB0072 | 1,2,4-trimethylbenzene | Arenes               | -0.86  |
| DB0073 | 1,3,5-trimethylbenzene | Arenes               | -0.90  |
| DB0074 | 1-Methylnapthalene     | Arenes               | -2.40  |
| DB0075 | 1,3-Dimethylnapthalene | Arenes               | -2.47  |
| DB0076 | 1,4-Dimethylnapthalene | Arenes               | -2.82  |
| DB0077 | 2,3-Dimethylnapthalene | Arenes               | -2.78  |
| DB0078 | 2,6-Dimethylnapthalene | Arenes               | -2.63  |
| DB0079 | 2,7-Dimethylnapthalene | Arenes               | -2.63  |
| DB0080 | 2-methylpyridine       | Heterocyclics        | -4.63  |
| DB0081 | 3-methylpyridine       | Heterocyclics        | -4.77  |
| DB0082 | 4-methylpyridine       | Heterocyclics        | -4.91  |
| DB0083 | 2,3-dimethylpyridine   | Heterocyclics        | -4.82  |
| DB0084 | 2,4-dimethylpyridine   | Heterocyclics        | -4.86  |
| DB0085 | 2,5-dimethylpyridine   | Heterocyclics        | -4.71  |
| DB0086 | 2,6-dimethylpyridine   | Heterocyclics        | -4.60  |
| DB0087 | 3,4-dimethylpyridine   | Heterocyclics        | -5.22  |
| DB0088 | 3,5-dimethylpyridine   | Heterocyclics        | -4.84  |
| DB0089 | 2-Methylindole         | Heterocyclics        | -5.90  |
| DB0090 | 3-Methylindole         | Heterocyclics        | -5.88  |
| DB0091 | 2-Methylthiophene      | Heterocyclics        | -1.38  |
| DB0092 | 2-Methylimidazole      | Heterocyclics        | -10.25 |
| DB0093 | 4-Methylimidazole      | Heterocyclics        | -10.27 |
| DB0094 | Chloroethane           | Haloalkanes          | -0.63  |
| DB0095 | Bromoethane            | Haloalkanes          | -0.71  |

|        |                            |             |       |
|--------|----------------------------|-------------|-------|
| DB0096 | Iodoethane                 | Haloalkanes | -0.73 |
| DB0097 | 1-chloropropane            | Haloalkanes | -0.32 |
| DB0098 | Bromopropane               | Haloalkanes | -0.56 |
| DB0099 | 1-Iodopropane              | Haloalkanes | -0.56 |
| DB0100 | 1-Chlorobutane             | Haloalkanes | -0.15 |
| DB0101 | 1-Bromobutane              | Haloalkanes | -0.41 |
| DB0102 | 1-Iodobutane               | Haloalkanes | -0.26 |
| DB0103 | 1-Chloropentane            | Haloalkanes | -0.07 |
| DB0104 | 2-chloropropane            | Haloalkanes | -0.25 |
| DB0105 | 2-Bromopropane             | Haloalkanes | -0.48 |
| DB0106 | 2-Iodopropane              | Haloalkanes | -0.46 |
| DB0107 | 2-Chlorobutane             | Haloalkanes | 0.07  |
| DB0108 | 2-Chloropentane            | Haloalkanes | 0.07  |
| DB0109 | 3-Chloropentane            | Haloalkanes | 0.06  |
| DB0110 | 2-chloro-2-methylpropane   | Haloalkanes | 1.09  |
| DB0111 | 2-bromo-2-methylpropane    | Haloalkanes | 0.84  |
| DB0112 | Fluorobenzene              | Halobenzene | -0.79 |
| DB0113 | Chlorobenzene              | Halobenzene | -1.09 |
| DB0114 | Bromobenzene               | Halobenzene | -1.46 |
| DB0115 | Iodobenzene                | Halobenzene | -1.74 |
| DB0116 | 2-Chlorotoluene            | Halophenyl  | -1.15 |
| DB0117 | 2-Bromotoluene             | Halophenyl  | -2.37 |
| DB0118 | m-chlorotoluene            | Halophenyl  | -1.92 |
| DB0119 | p-chlorotoluene            | Halophenyl  | 1.92  |
| DB0120 | p-bromotoluene             | Halophenyl  | -1.39 |
| DB0121 | 1,1-difluoroethane         | Haloalkanes | -0.11 |
| DB0122 | 1,1 dichloroethane         | Haloalkanes | -0.85 |
| DB0123 | 1,2 dichloroethane         | Haloalkanes | -1.79 |
| DB0124 | 1,1,1 trichloroethane      | Haloalkanes | -0.23 |
| DB0125 | 1,1,2 trichloroethane      | Haloalkanes | -1.97 |
| DB0126 | 1,1,1,2 tetrachloroethane  | Haloalkanes | -1.20 |
| DB0127 | 1,1,2,2 tetrachloroethane  | Haloalkanes | -2.42 |
| DB0128 | 1,2-dibromoethane          | Haloalkanes | -2.22 |
| DB0129 | 1,2 dichloropropane        | Haloalkanes | -1.26 |
| DB0130 | 1,3 dichloropropane        | Haloalkanes | -1.90 |
| DB0131 | 1,2-dibromopropane         | Haloalkanes | -1.94 |
| DB0132 | 1,3-dibromopropane         | Haloalkanes | -1.97 |
| DB0133 | 1,1-dichlorobutane         | Haloalkanes | -0.70 |
| DB0134 | 1,4-dichlorobutane         | Haloalkanes | -2.32 |
| DB0135 | 1,2-dichlorobenzene        | Halobenzene | -1.36 |
| DB0136 | 1,3-dichlorobenzene        | Halobenzene | -0.98 |
| DB0137 | 1,4-dichlorobenzene        | Halobenzene | -1.01 |
| DB0138 | 1,4-dibromobenzene         | Halobenzene | -2.30 |
| DB0139 | 1,2,3-trichlorobenzene     | Halobenzene | -1.24 |
| DB0140 | 1,2,4-trichlorobenzene     | Halobenzene | -1.12 |
| DB0141 | 1,3,5-trichlorobenzene     | Halobenzene | -0.78 |
| DB0142 | 1,2,3,4-tetrachlorobenzene | Halobenzene | -1.34 |
| DB0143 | 1,2,3,5-tetrachlorobenzene | Halobenzene | -1.62 |
| DB0144 | 1,2,4,5-tetrachlorobenzene | Halobenzene | -1.34 |
| DB0145 | Methyl amine               | Amines      | -4.57 |

|        |                          |                 |        |
|--------|--------------------------|-----------------|--------|
| DB0146 | Ethyl amine              | Amines          | -4.49  |
| DB0147 | n-propyl amine           | Amines          | -4.44  |
| DB0148 | n-butyl amine            | Amines          | -4.32  |
| DB0149 | n-pentyl amine           | Amines          | -4.10  |
| DB0150 | n-hexyl amine            | Amines          | -4.02  |
| DB0151 | n-heptylamine            | Amines          | -3.79  |
| DB0152 | n-octylamine             | Amines          | -3.65  |
| DB0153 | Ethylenediamine          | Amines          | -9.82  |
| DB0154 | cyclohexylamine          | Amines          | -4.59  |
| DB0155 | Aniline                  | Amines          | -5.39  |
| DB0156 | Dimethyl amine           | Amines          | -4.30  |
| DB0157 | Diethyl amine            | Amines          | -4.08  |
| DB0158 | Di-n-propylamine         | Amines          | -3.67  |
| DB0159 | Di-n-butyl amine         | Amines          | -3.32  |
| DB0160 | Trimethyl amine          | Amines          | -3.23  |
| DB0161 | Pyrrolidine              | Amines          | -5.49  |
| DB0162 | Piperidine               | Amines          | -5.12  |
| DB0163 | N-Methylpyrrolidine      | Amines          | -3.99  |
| DB0164 | N-Methylpiperidine       | Amines          | -3.88  |
| DB0165 | Piperazine               | Amines          | -7.39  |
| DB0166 | N-methylpiperazine       | Amines          | -7.77  |
| DB0167 | Diisopropylamine         | Amines          | -3.22  |
| DB0168 | Triethyl amine           | Amines          | -3.09  |
| DB0169 | Aziridine                |                 | -5.42  |
| DB0170 | Azetidine                |                 | -5.56  |
| DB0171 | Morpholine               |                 | -7.17  |
| DB0172 | N-methylmorpholine       |                 | -6.33  |
| DB0173 | Ammonia                  |                 | -4.30  |
| DB0174 | N,N-Dimethyl aniline     | Amines          | -2.90  |
| DB0175 | N,N-Dimethylpiperazine   | Amines          | -7.58  |
| DB0176 | 1-Amino-2-methoxy-ethane | Amines          | -6.60  |
| DB0177 | N-Methyl formamide       | Amides          | -10.00 |
| DB0178 | Acetamide                | Amides          | -9.71  |
| DB0179 | Propionamide             | Amides          | -9.42  |
| DB0180 | benzamide                | Amides          | -10.97 |
| DB0181 | N-Methylacetamide        | Amides          | -10.04 |
| DB0182 | N,N-Dimethylformamide    | Amides          | -7.81  |
| DB0183 | N,N-Dimethyl-acetamide   | Amides          | -8.53  |
| DB0184 | n-butylacetamide         | Amides          | -9.31  |
| DB0185 | nitromethane             | Nitro compounds | -4.00  |
| DB0186 | nitroethane              | Nitro compounds | -3.72  |
| DB0187 | 1-nitropropane           | Nitro compounds | -3.34  |
| DB0188 | 1-nitrobutane            | Nitro compounds | -3.08  |
| DB0189 | 1-nitropentane           | Nitro compounds | -2.82  |
| DB0190 | 2-nitropropane           | Nitro compounds | -3.14  |
| DB0191 | nitrobenzene             | Nitro compounds | -4.13  |
| DB0192 | 2-nitrophenol            | Nitro compounds | -4.58  |
| DB0193 | 3-nitrophenol            | Nitro compounds | -9.63  |
| DB0194 | p-nitrophenol            | Nitro compounds | -10.65 |

|        |                        |                  |        |
|--------|------------------------|------------------|--------|
| DB0195 | 2-nitrotoluene         | Nitro compounds  | -3.59  |
| DB0196 | 3-nitrotoluene         | Nitro compounds  | -3.46  |
| DB0197 | m-nitroaniline         | Nitro compounds  | -8.86  |
| DB0198 | acetaldehyde           | Aldehydes        | -3.50  |
| DB0199 | propionaldehyde        | Aldehydes        | -3.43  |
| DB0200 | butyraldehyde          | Aldehydes        | -3.18  |
| DB0201 | Pentanal               | Aldehydes        | -3.03  |
| DB0202 | Hexanal                | Aldehydes        | -2.81  |
| DB0203 | Heptanal               | Aldehydes        | -2.67  |
| DB0204 | Octanal                | Aldehydes        | -2.29  |
| DB0205 | Nonanal                | Aldehydes        | -2.07  |
| DB0206 | isobutaldehyde         | Aldehydes        | -2.86  |
| DB0207 | Benzaldehyde           | Aldehydes        | -4.02  |
| DB0208 | m-Hydroxybenzaldehyde  | Aldehydes        | -9.51  |
| DB0209 | p-Hydroxybenzaldehyde  | Aldehydes        | -10.48 |
| DB0210 | formaldehyde           | Aldehydes        | -2.75  |
| DB0211 | Ethanoic acid          | Carboxylic Acids | -6.69  |
| DB0212 | Propanoic acid         | Carboxylic Acids | -6.46  |
| DB0213 | Butanoic acid          | Carboxylic Acids | -6.35  |
| DB0214 | Pentanoic acid         | Carboxylic Acids | -6.16  |
| DB0215 | Hexanoic acid          | Carboxylic Acids | -6.21  |
| DB0216 | methoxymethane         | Ethers           | -1.91  |
| DB0217 | methyl-ethyl-ether     | Ethers           | -2.10  |
| DB0218 | Methyl propyl ether    | Ethers           | -1.66  |
| DB0219 | Methyl isopropyl ether | Ethers           | -2.01  |
| DB0220 | t-Butyl methyl ether   | Ethers           | -2.21  |
| DB0221 | 2-Methoxyethanol       | Ethers           | -6.76  |
| DB0222 | 2-methoxyethanamine    | Ethers           | -6.55  |
| DB0223 | 2-methoxyphenol        | Ethers           | -5.57  |
| DB0224 | 3-methoxyphenol        | Ethers           | -7.66  |
| DB0225 | 2-methoxyaniline       | Ethers           | -6.12  |
| DB0226 | 3-methoxyaniline       | Ethers           | -7.29  |
| DB0227 | 4-methoxyaniline       | Ethers           | -7.48  |
| DB0228 | Methanethiol           | Thiols           | -1.24  |
| DB0229 | Ethanethiol            | Thiols           | -1.19  |
| DB0230 | 1-Propanethiol         | Thiols           | -1.06  |
| DB0231 | n-butanethiol          | Thiols           | -0.99  |
| DB0232 | Thiophenol             | Thiols           | -2.55  |
| DB0233 | acetonitrile           | Nitriles         | -3.89  |
| DB0234 | propanenitrile         | Nitriles         | -3.85  |
| DB0235 | butanenitrile          | Nitriles         | -3.65  |
| DB0236 | pentanenitrile         | Nitriles         | -3.52  |
| DB0237 | benzonitrile           | Nitriles         | -4.16  |
| DB0238 | 3-cyanophenol          | Nitriles         | -9.66  |
| DB0239 | 4-cyanophenol          | Nitriles         | -10.17 |
| DB0240 | 3-cyanopyridine        | Nitriles         | -6.75  |
| DB0241 | 4-cyanopyridine        | Nitriles         | -6.02  |
